# Supplementary material for: Homogeneous immunoassay utilizing fluorescence resonance energy transfer from quantum dots to tyramide dyes deposited on full immunocomplexes
Source: Royal Society of Chemistry journal article supplement (doi:10.1039/d3an01174g), 2023-01-01
Supplement: d3an01174g1.pdf [file d3an01174g1.pdf]

**Homogeneous immunoassay utilizing fluorescence resonance  
energy transfer from quantum dots to tyramide dyes deposited on  
full immunocomplexes**

Zihan Xu<sup>‡</sup>, Xiaojun Liu<sup>‡</sup>, Chenghua Zong<sup>‡</sup>, Qingquan Zhang and Hongwei Gai\*

\* Corresponding Author: \* Hongwei Gai, Email: [gai@jsnu.edu.cn](mailto:gai@jsnu.edu.cn)

<sup>‡</sup>These authors contributed equally

School of Chemistry and Materials Science, Jiangsu Normal University, Shanghai  
Road 101, Xuzhou, Jiangsu, China

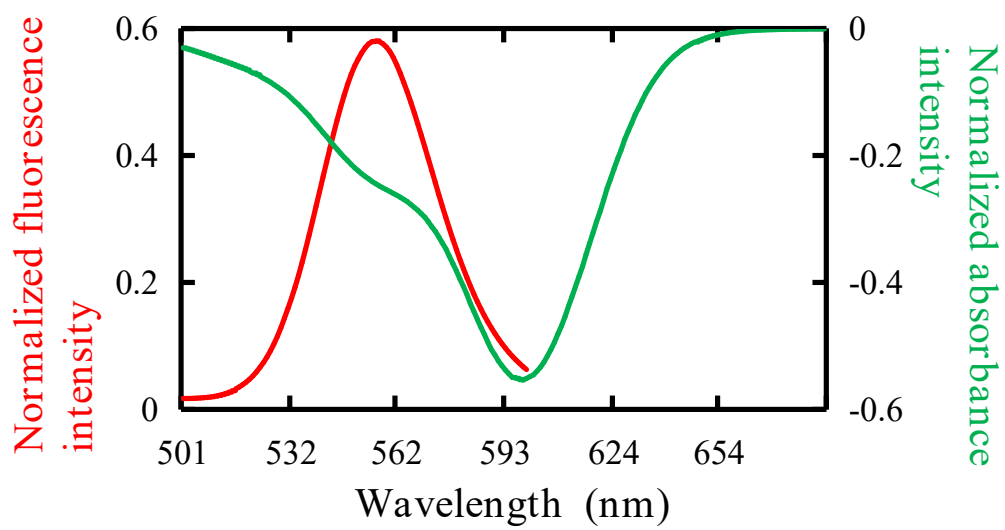

Figure S1. The overlapping between the donor emission spectrum (red) and the acceptor absorbance spectrum (green).
